# Supplementary material for: Multiparametric Early Detection and Prediction of Cardiotoxicity Using Myocardial Strain, T1 and T2 Mapping, and Biochemical Markers: A Longitudinal Cardiac Resonance Imaging Study During 2 Years of Follow-Up
Source: PubMed Central journal article supplement — Circ Cardiovasc Imaging. 2021 Jun 16;14(6):e012459. doi: 10.1161/CIRCIMAGING.121.012459 (PMC8208092; doi:10.1161/circimaging.121.012459), 2021-06-16
Supplement: hci-14-e012459-s001.pdf [file hci-14-e012459-s001.pdf]

## SUPPLEMENTAL MATERIALS

### **Multiparametric Early Detection and Prediction of Cardiotoxicity Using Myocardial Strain, T1 and T2 Mapping and Biochemical Markers. A Longitudinal Cardiac Resonance Imaging Study During Two Years of Follow-up.**

Sorin Giusca, MD (1)\*, Grigorios Korosoglou, MD (1)\*, Moritz Montenbruck, MD (2), Blaž Geršak, MD (3), Arne Kristian Schwarz, MD (2), Sebastian Esch, MD (2), Sebastian Kelle, MD (4,5,6), Pia Wülfing, MD (7), Susan Dent, MD (8), Daniel Lenihan, MD (9) and Henning Steen, MD (2)

\*The authors contributed equally to this study.

- 1) GRN Academic Teaching Hospital Weinheim, Weinheim, Germany
- 2) Marien Hospital, Hamburg, Germany
- 3) University of Ljubljana, Ljubljana, Slovenia
- 4) Department of Internal Medicine / Cardiology, Deutsches Herzzentrum Berlin, Berlin, Germany
- 5) Charité – Universitätsmedizin Berlin, Internal Medicine and Cardiology, Berlin, Germany
- 6) DZHK (German Centre for Cardiovascular Research), Berlin, Germany
- 7) Mammazentrum am Krankenhaus Jerusalem, Hamburg, Germany
- 8) Duke Cancer Institute, Durham, North Carolina, USA
- 9) Cardio-Oncology Center of Excellence, Washington University School of Medicine, St Louis, Missouri, USA

**A.**

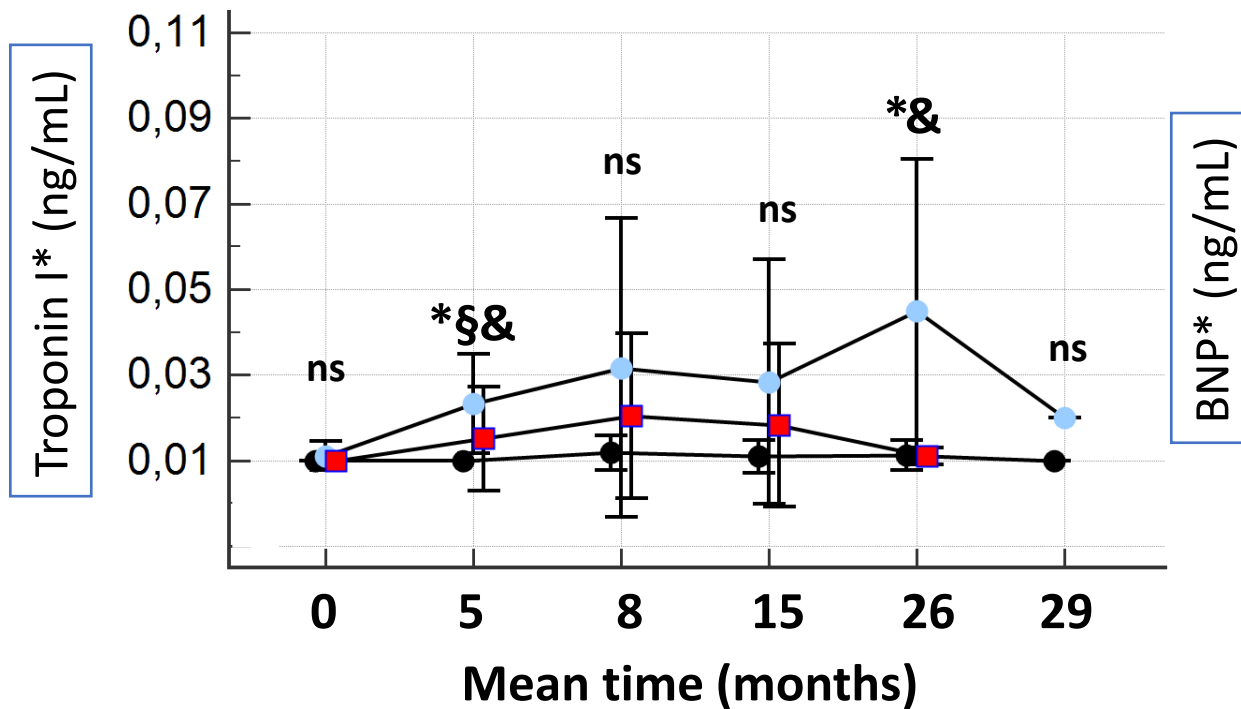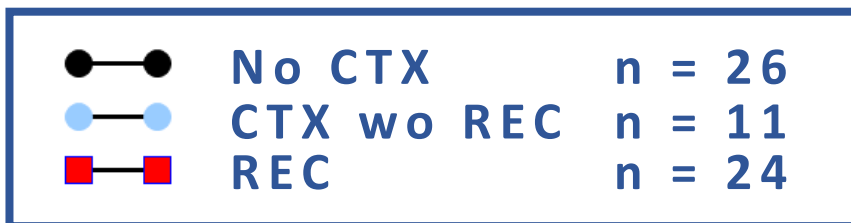

All timepoints were considered in patients with no CTX and REC. All timepoints after first occurrence of CTX were considered in patients with CTX.

**B.**

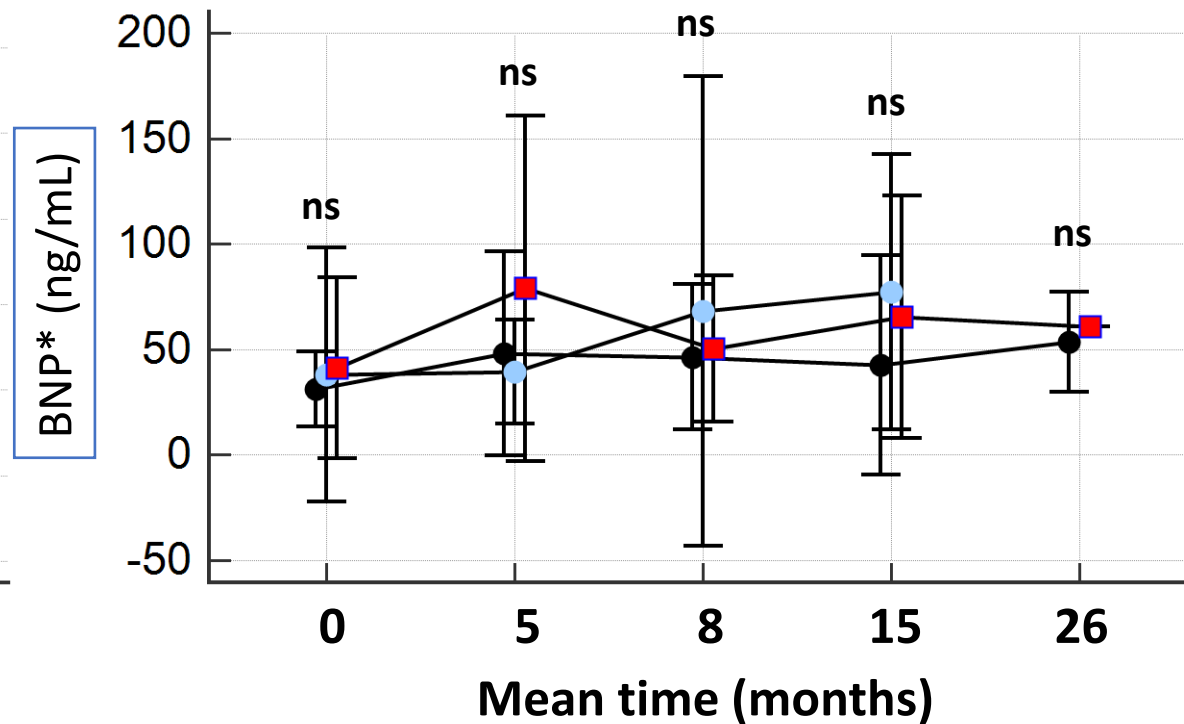

\*, p<0.05 for no CTX vs. CTX (wo REC)  
 §, p<0.05 for no CTX vs. REC  
 &, p<0.05 for CTX (wo REC) vs. REC  
 \*,§ and & by Conover's post hoc analysis  
 p values by Kruskal-Wallis tests (DF=2)

No CTX versus CTX and sub-CTX  
(Recovery excluded)

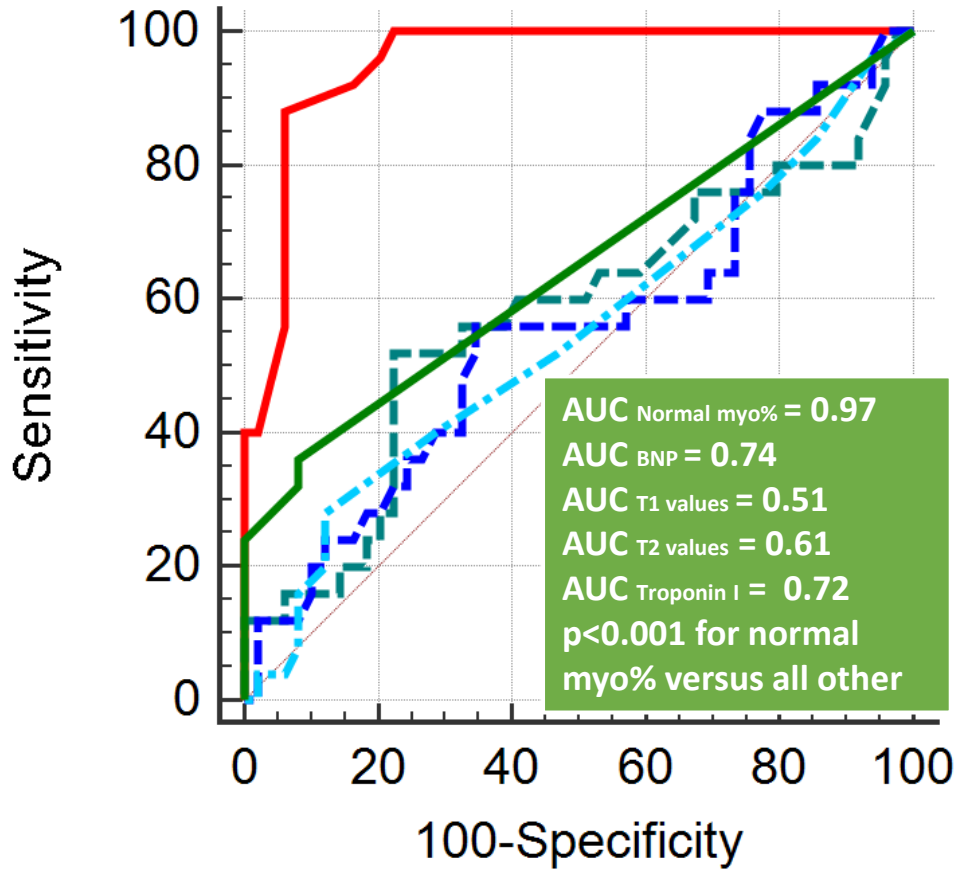

- Normal myocardium(%)
- BNP\*
- T1 values
- T2 values
- Troponin I\*

\* For n=196 timepoints with available biomarkers

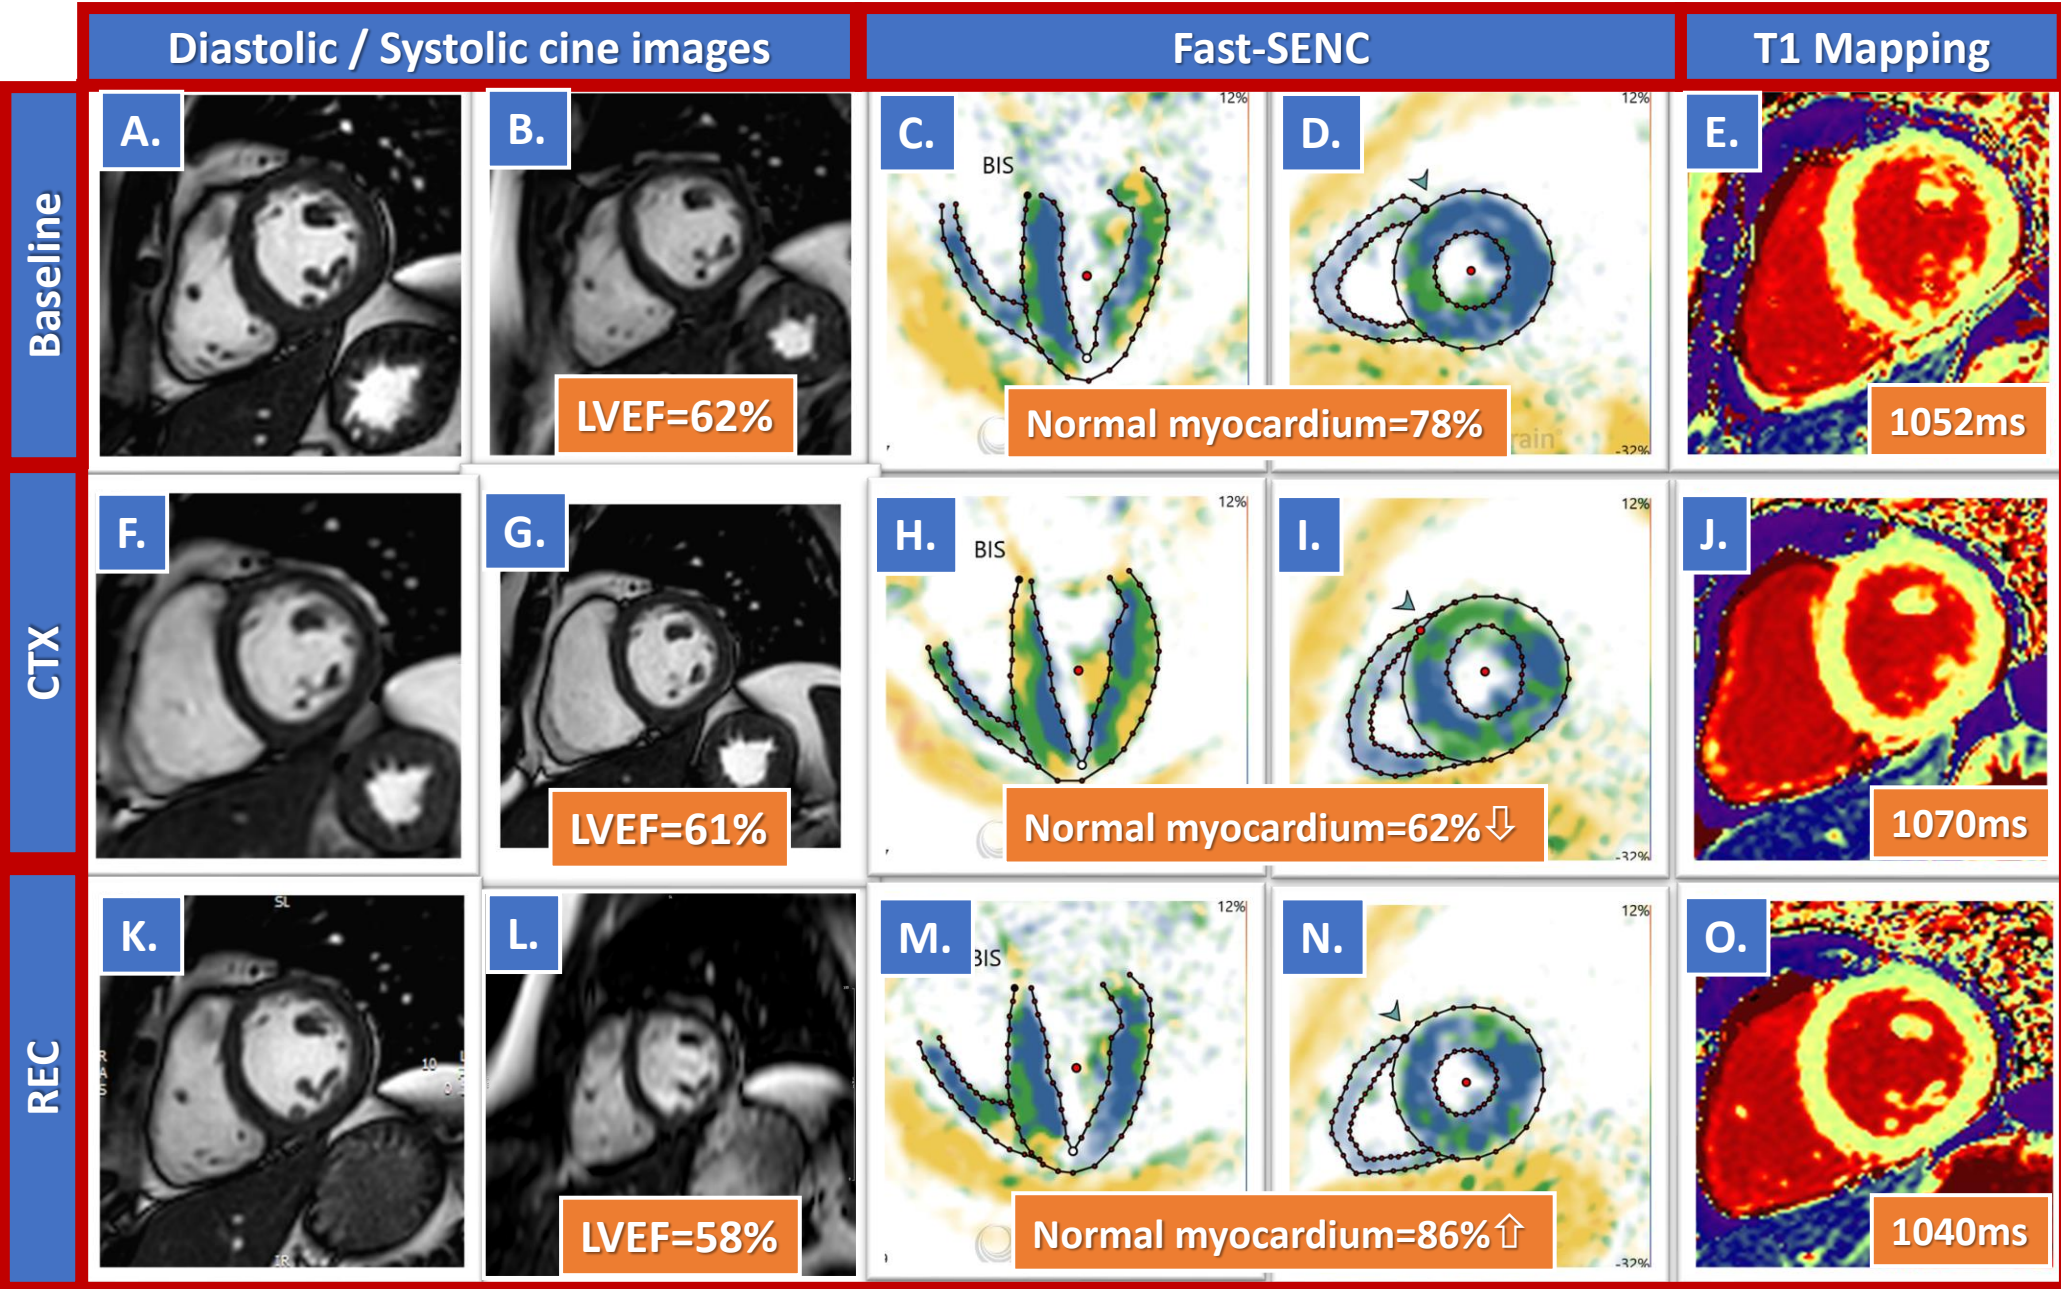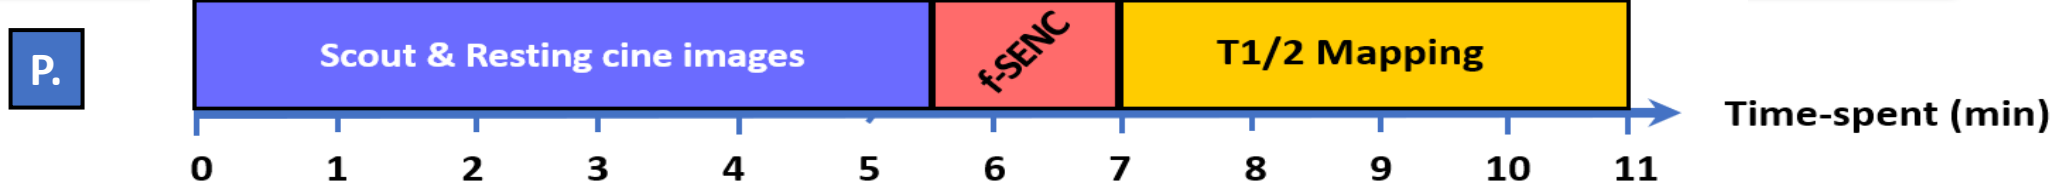

Supplemental Figure III

## SUPPLEMENTAL MATERIALS

### Figure Captions

**Suppl. Figure I:** Time response for cardiac biomarkers troponin I (A) and BNP (B).

**Suppl. Figure II:** Normal myocardium (%) demonstrated superior diagnostic value over T1, T2, BNP and troponin I.

**Suppl. Figure III:** Representative cine, fast-SENC and T1 mapping images in the same patient at baseline (A-E), after occurrence of CTX (F-J) and during REC (K-O).
